# Supplementary material for: On the interpretation of transport properties of sodium cholate and sodium deoxycholate in binary and ternary aqueous mixtures
Source: Royal Society of Chemistry journal article supplement (doi:10.1039/c1cp20922a), 2011-01-01
Supplement: c1cp20922a.pdf [file c1cp20922a.pdf]

## Supporting Information

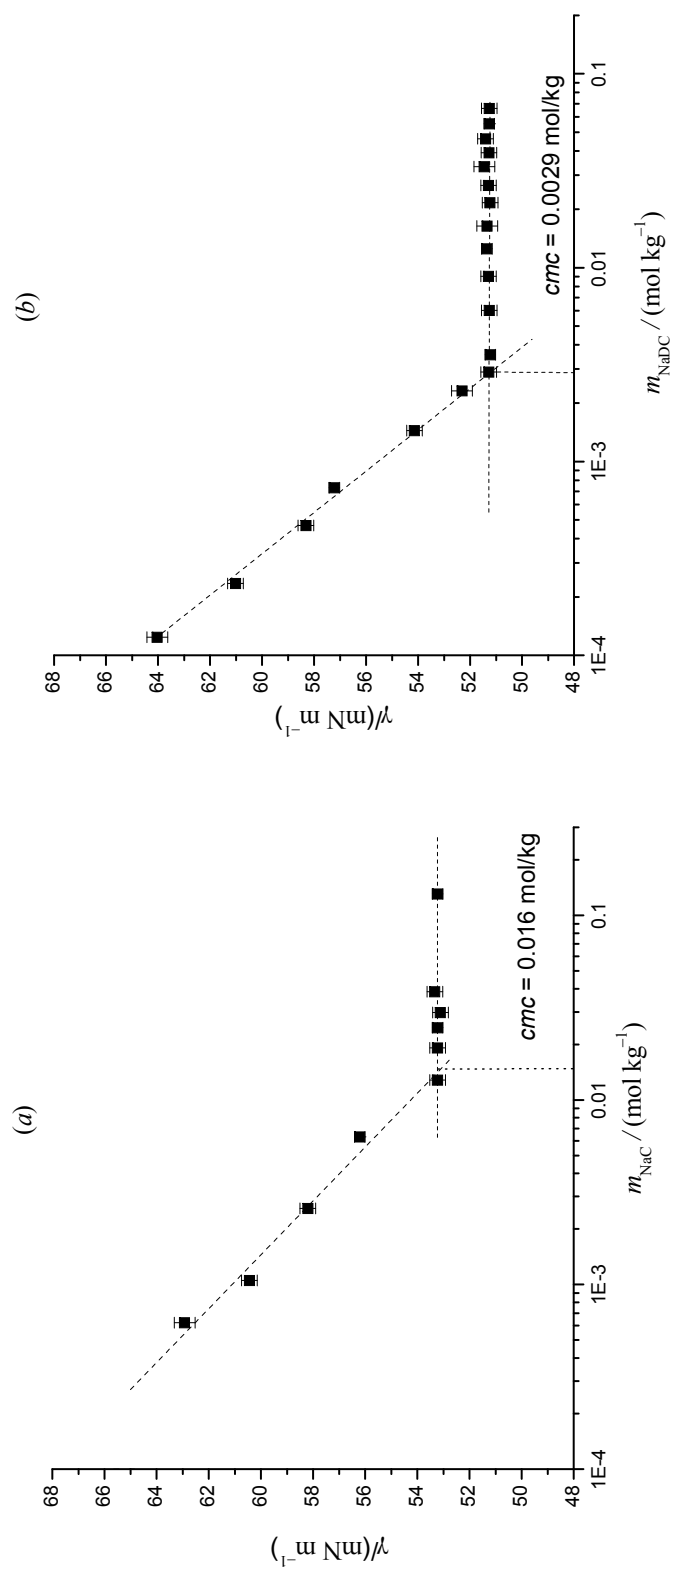

**Figure S1** –Surface tension data at 25.0 °C for the systems NaC – H<sub>2</sub>O (a) and NaDC – H<sub>2</sub>O (b), as a function of the concentration.

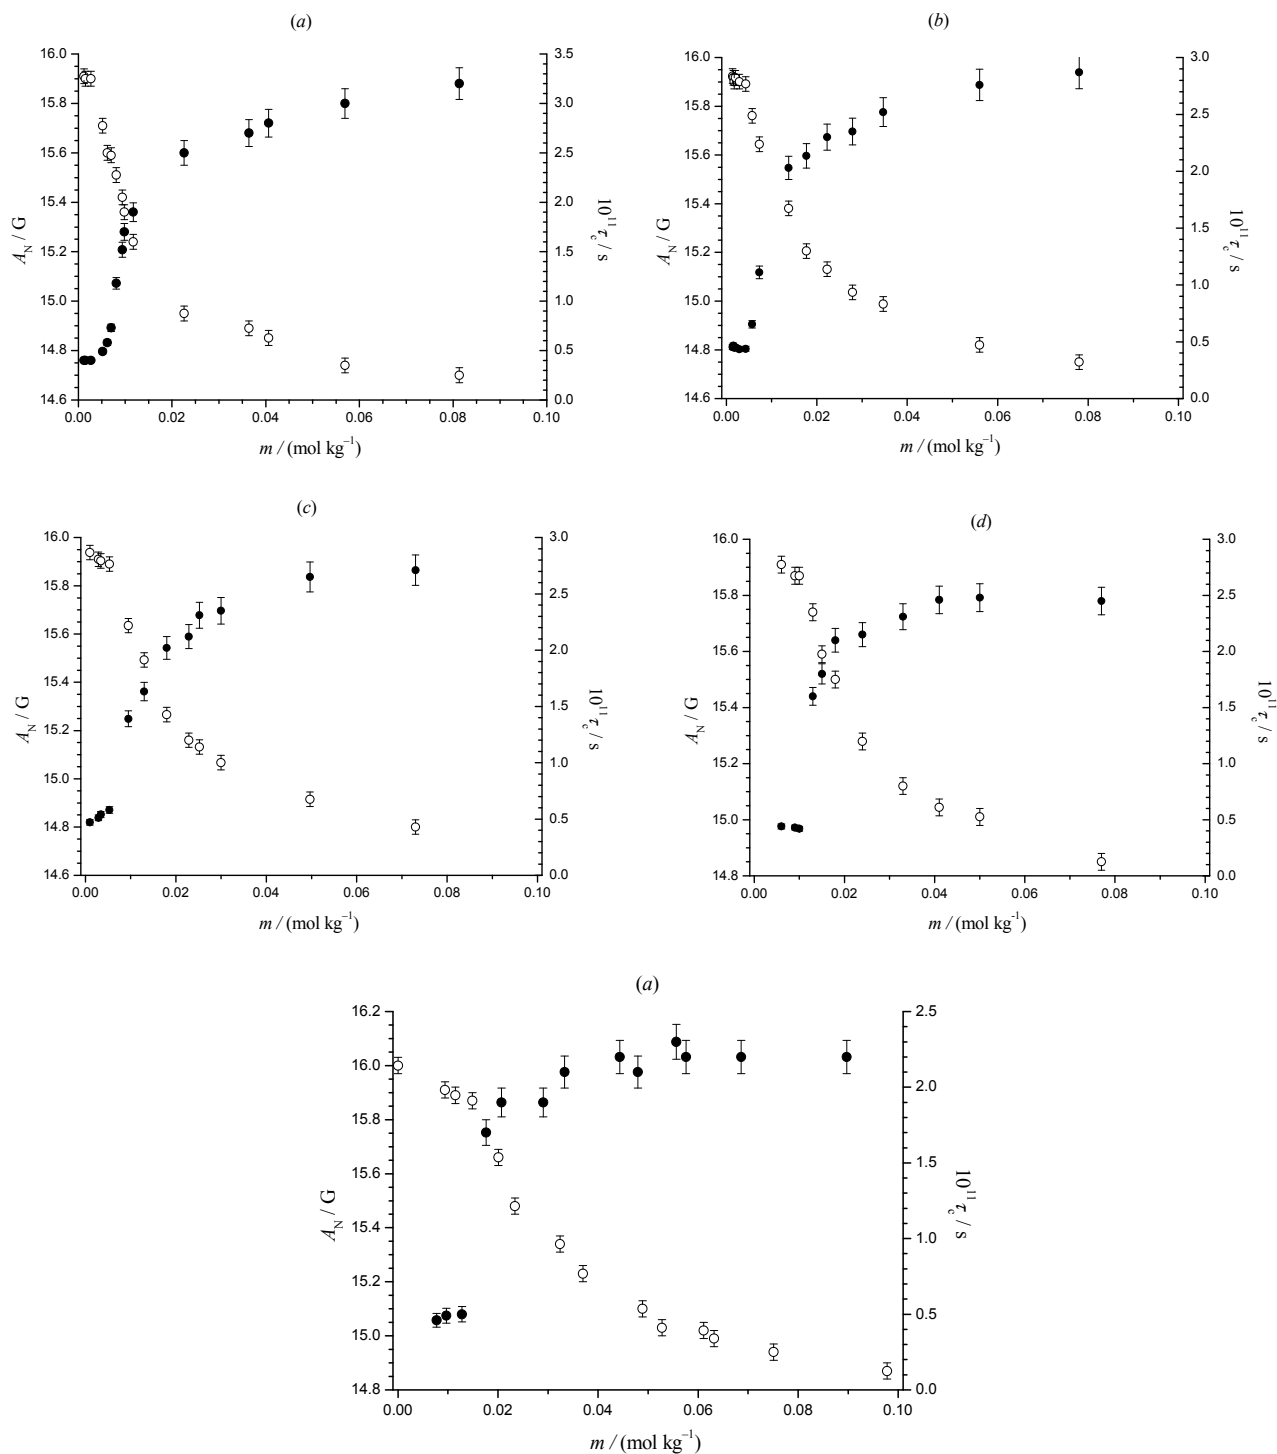

**Figure S2** – Nitrogen hyperfine coupling constant  $A_N$  (–) and correlation time  $\tau_c$  (.) of androstane in NaC – NaDC – H<sub>2</sub>O systems at (a)  $\alpha = 0$  (NaC binary aqueous system); (b)  $\alpha = 0.100$ ; (c)  $\alpha = 0.300$ ; (d)  $\alpha = 0.700$ ; and (e)  $\alpha = 1.000$  (NaC binary aqueous system), reported as a function of the total surfactant molality  $m$  at 25°C.

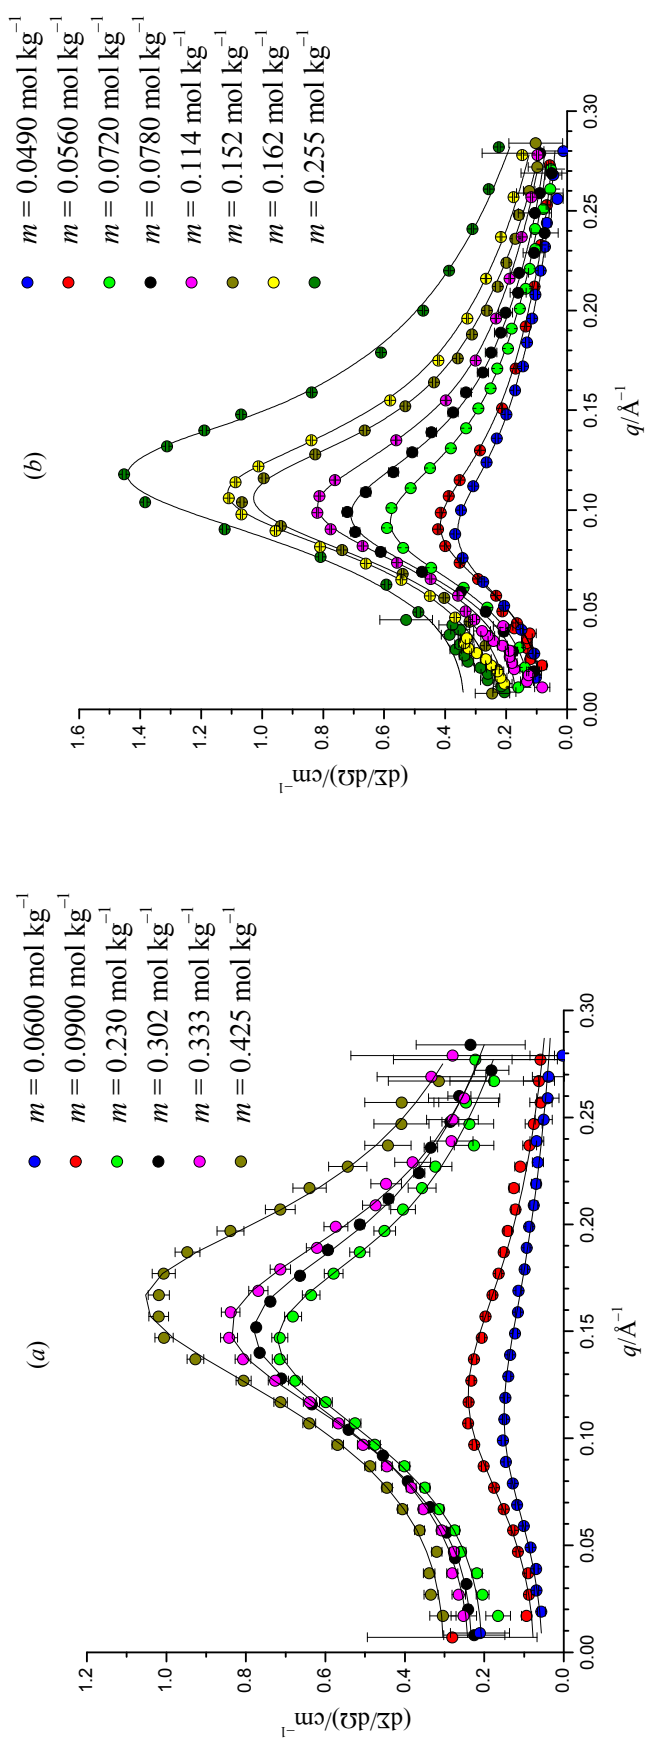

**Figure S3** – Scattering cross sections at 25°C for the systems NaC – D<sub>2</sub>O (a); NaDC – D<sub>2</sub>O (b) at various solute concentrations, as indicated in the own legends. Solid lines represent the curves obtained by the fitting procedure described in the text.

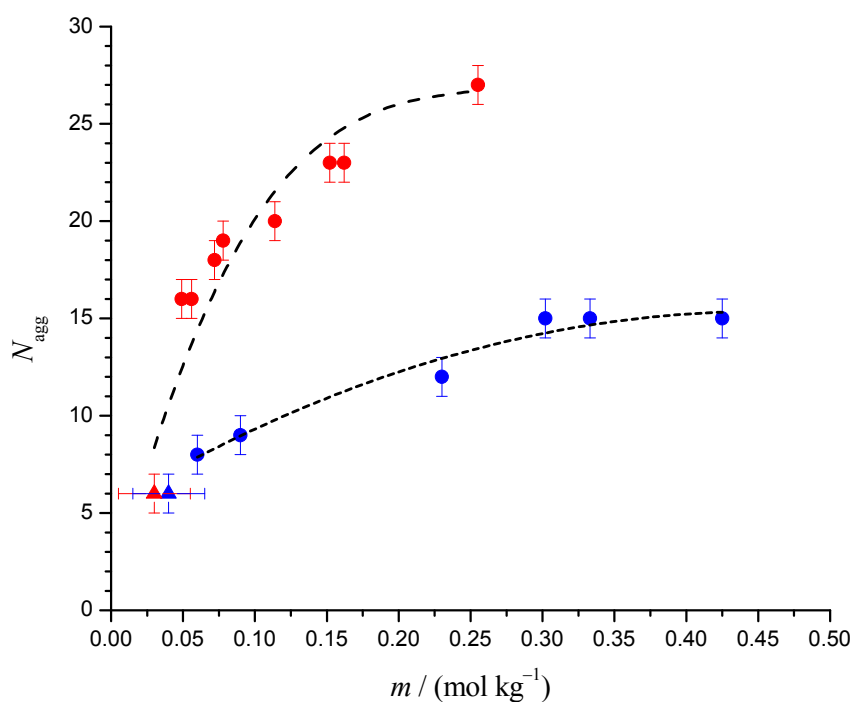

**Figure S4** – Aggregation numbers  $N_{agg}$  reported as a function of the molality, obtained from analysis of SANS data for NaC – D<sub>2</sub>O (●) and NaDC – D<sub>2</sub>O (●) binary systems. Triangular symbols indicates the  $N_{agg}$  values obtained from fitting of equation (14) to experimental diffusion data for NaC – D<sub>2</sub>O (7) and NaDC – D<sub>2</sub>O (7) systems.

| Molecule                                                                            | “Dry” molar volume $v$ | Scattering length $\Sigma b_i$   |
|-------------------------------------------------------------------------------------|------------------------|----------------------------------|
| Sodium cholate (NaC)                                                                |                        |                                  |
| 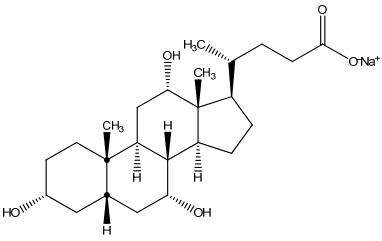   | $550 \text{ \AA}^3$    | $8.43 \cdot 10^{-7} \text{ \AA}$ |
| Sodium deoxycholate (NaDC)                                                          |                        |                                  |
|   | $570 \text{ \AA}^3$    | $7.09 \cdot 10^{-7} \text{ \AA}$ |
| Androstane nitroxide                                                                |                        |                                  |
|  |                        |                                  |

**Chart S1** – Structure of sodium cholate, sodium deoxycholate, and androstane nitroxide.

| $\alpha$ | $\frac{cmc}{\text{mmol kg}^{-1}}$ | $\frac{cmc}{\text{mmol kg}^{-1}}$ |
|----------|-----------------------------------|-----------------------------------|
|          | Surface tension                   | EPR                               |
| 0.       | $3.0 \pm 0.1$                     | $3 \pm 1$                         |
| 0.100    |                                   | $4 \pm 1$                         |
| 0.196    | $3.1 \pm 0.1$                     |                                   |
| 0.300    |                                   | $5 \pm 1$                         |
| 0.486    | $5.5 \pm 0.1$                     |                                   |
| 0.500    |                                   | $7 \pm 1$                         |
| 0.581    | $5.8 \pm 0.1$                     |                                   |
| 0.651    | $7.2 \pm 0.1$                     |                                   |
| 0.700    |                                   | $10 \pm 1$                        |
| 1.       | $13.0 \pm 0.1$                    | $15 \pm 1$                        |

**Table S1** – Critical micellar concentration  $cmc$  obtained at 25°C for ternary aqueous systems of NaC and NaDC as a function of the stoichiometric molar fraction  $\alpha$  of NaC defined in equation (1).

| $\frac{c_{\text{NaC}}}{\text{mol dm}^{-3}}$ | $\frac{10^5 D}{\text{cm}^2 \text{ s}^{-1}}$ | $\frac{c_{\text{NaDC}}}{\text{mol dm}^{-3}}$ | $\frac{10^5 D}{\text{cm}^2 \text{ s}^{-1}}$ |
|---------------------------------------------|---------------------------------------------|----------------------------------------------|---------------------------------------------|
| $9.97 \cdot 10^{-4}$                        | $0.649 \pm 0.013$                           | $1.00 \cdot 10^{-5}$                         | $0.720 \pm 0.014$                           |
| $2.99 \cdot 10^{-3}$                        | $0.642 \pm 0.013$                           | $2.99 \cdot 10^{-3}$                         | $0.698 \pm 0.014$                           |
| $4.98 \cdot 10^{-3}$                        | $0.646 \pm 0.013$                           | $3.98 \cdot 10^{-3}$                         | $0.587 \pm 0.014$                           |
| $9.94 \cdot 10^{-3}$                        | $0.635 \pm 0.013$                           | $4.98 \cdot 10^{-3}$                         | $0.613 \pm 0.012$                           |
| $1.19 \cdot 10^{-2}$                        | $0.608 \pm 0.012$                           | $7.95 \cdot 10^{-3}$                         | $0.470 \pm 0.012$                           |
| $1.59 \cdot 10^{-2}$                        | $0.552 \pm 0.011$                           | $1.19 \cdot 10^{-2}$                         | $0.441 \pm 0.010$                           |
| $1.78 \cdot 10^{-2}$                        | $0.530 \pm 0.011$                           | $1.98 \cdot 10^{-2}$                         | $0.446 \pm 0.010$                           |
| $1.98 \cdot 10^{-2}$                        | $0.528 \pm 0.011$                           | $2.47 \cdot 10^{-2}$                         | $0.454 \pm 0.010$                           |
| $2.47 \cdot 10^{-2}$                        | $0.484 \pm 0.010$                           | $2.96 \cdot 10^{-2}$                         | $0.464 \pm 0.010$                           |
| $2.96 \cdot 10^{-2}$                        | $0.486 \pm 0.010$                           | $3.45 \cdot 10^{-2}$                         | $0.447 \pm 0.010$                           |
| $3.94 \cdot 10^{-2}$                        | $0.492 \pm 0.010$                           | $3.93 \cdot 10^{-2}$                         | $0.453 \pm 0.010$                           |
| $4.90 \cdot 10^{-2}$                        | $0.487 \pm 0.010$                           | $4.42 \cdot 10^{-2}$                         | $0.461 \pm 0.010$                           |
| $5.87 \cdot 10^{-2}$                        | $0.492 \pm 0.010$                           | $5.38 \cdot 10^{-2}$                         | $0.442 \pm 0.010$                           |
|                                             |                                             | $5.86 \cdot 10^{-2}$                         | $0.459 \pm 0.010$                           |
|                                             |                                             | $6.82 \cdot 10^{-2}$                         | $0.465 \pm 0.010$                           |
|                                             |                                             | $7.76 \cdot 10^{-2}$                         | $0.459 \pm 0.010$                           |
|                                             |                                             | $8.71 \cdot 10^{-2}$                         | $0.467 \pm 0.010$                           |

**Table S2** – Mutual diffusion coefficients obtained at 25°C for NaC and NaDC aqueous binary systems, by means of the Taylor dispersion technique

| $\frac{c}{\text{mol dm}^{-3}}$ | $\frac{10^5 D_{1,1}}{\text{cm}^2 \text{ s}^{-1}}$ | $\frac{10^5 D_{2,2}}{\text{cm}^2 \text{ s}^{-1}}$ | $\frac{10^5 D_{1,2}}{\text{cm}^2 \text{ s}^{-1}}$ | $\frac{10^5 D_{2,1}}{\text{cm}^2 \text{ s}^{-1}}$ |
|--------------------------------|---------------------------------------------------|---------------------------------------------------|---------------------------------------------------|---------------------------------------------------|
| 0                              | <i>0.533</i>                                      | <i>0.598</i>                                      | <i>0.101</i>                                      | <i>0.123</i>                                      |
| 0.008                          | 0.524 ± 0.015                                     | 0.199 ± 0.008                                     | 0.318 ± 0.002                                     | 0.073 ± 0.002                                     |
| 0.018                          | 0.486 ± 0.013                                     | 0.209 ± 0.008                                     | 0.225 ± 0.011                                     | 0.052 ± 0.009                                     |
| 0.040                          | 0.373 ± 0.006                                     | 0.311 ± 0.005                                     | 0.077 ± 0.006                                     | 0.153 ± 0.006                                     |
| 0.060                          | 0.353 ± 0.003                                     | 0.290 ± 0.002                                     | 0.099 ± 0.003                                     | 0.166 ± 0.003                                     |

**Table S3** – Main and cross diffusion coefficients obtained at 25°C for NaC – NaDC – H<sub>2</sub>O system at  $\alpha = 0.500$  (*i.e.*  $c_1 = c_2 = c$ ), by means of the Gouy interferometric method. Infinite dilution values, reported in italic, have been evaluated through the Nernst–Hartley equation.
